# Supplementary material for: Lead-free 3D hybrid perovskites based on an aziridinium cation
Source: Royal Society of Chemistry journal article supplement (doi:10.1039/d3qi00872j), 2023-01-01
Supplement: d3qi00872j1.pdf [file d3qi00872j1.pdf]

## Supporting Information

### **Lead-Free 3D Hybrid Perovskites based on Aziridinium Cation**

Olesia I. Kucheriv,<sup>a</sup> Valerii Y. Sirenko,<sup>a</sup> Hanna R. Petrosova,<sup>a</sup> Vadim A. Pavlenko,<sup>a</sup>  
Sergiu Shova\*<sup>b</sup> and Il'ya A. Gural'skiy\*<sup>a</sup>

<sup>a</sup>Department of Chemistry, Taras Shevchenko National University of Kyiv, Volodymyrska St. 64,  
Kyiv 01601, Ukraine

E-mail: illia.guralskyi@univ.kiev.ua

<sup>b</sup>Department of Inorganic Polymers, Petru Poni Institute of Macromolecular Chemistry, Aleea  
Grigore Ghica Voda 41-A, Iasi 700487, Romania

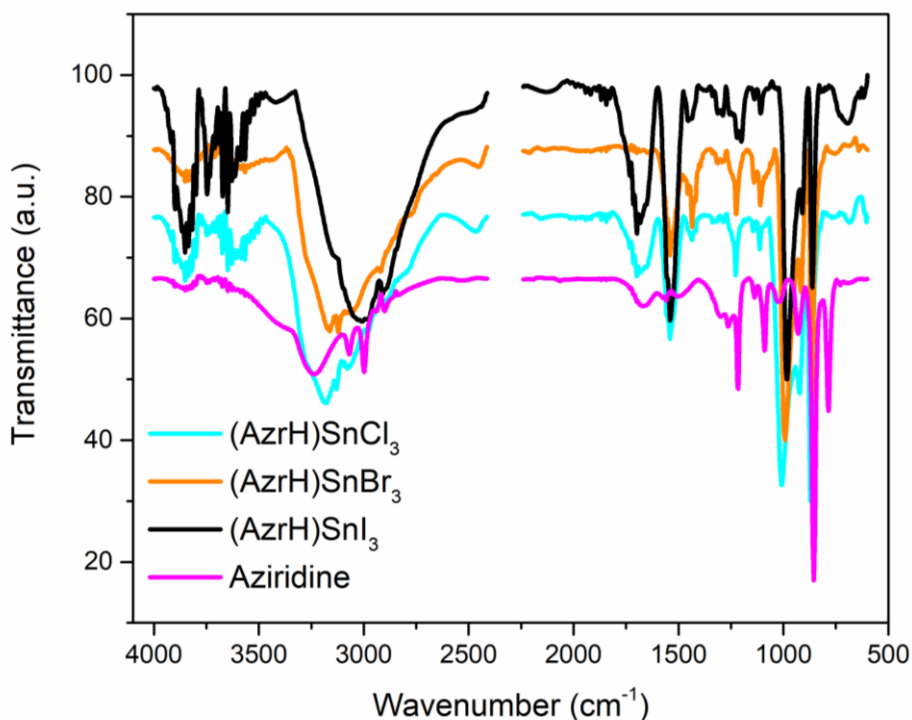

Figure S1. IR spectra of (AzrH)SnHal<sub>3</sub> and aziridine (4000 – 600 cm<sup>-1</sup> region).

Table S1. Interpretation of IR bands of (AzrH)SnHal<sub>3</sub> and aziridine.<sup>1,2</sup>

| Aziridine | SnCl | SnBr | SnI  | Bands assignment                         |
|-----------|------|------|------|------------------------------------------|
| 3234      | 3180 | 3158 | 3017 | NH <sub>str.</sub> / NH <sub>2str.</sub> |
| 3067      | 3127 | 3121 |      | CH <sub>2str.</sub> asym.                |
| 2996      | 2997 | 2919 | 2905 | CH <sub>2str.</sub> sym.                 |
|           | 1537 | 1537 | 1537 | NH <sub>2</sub> bending (scissoring)     |
|           | 1431 | 1431 | 1431 | NH <sub>2</sub> wagging                  |
| 1218      | 1228 | 1224 | 1220 | Ring stretch                             |
| 1136      | 1145 | 1140 | 1138 | CH <sub>2</sub> wagging                  |
| 1089      | 1114 | 1140 | 1138 | CH <sub>2</sub> twisting                 |
|           | 1009 | 995  | 985  | NH <sub>2</sub> rocking                  |
| 929       | 924  | 914  | 909  | Asymmetric ring deformation              |
| 858       | 868  | 863  | 858  | Symmetric ring deformation               |

Table S2. Bond valence sums<sup>3</sup> ( $s = \Sigma[(R_0 - R)/0.37]$ ), where R is the bond length and R<sub>0</sub> is bond-valence parameter according to O'Keeffe<sup>4</sup>) of (AzrH)SnHal<sub>3</sub>

|                         | T (K) | s    | R <sub>0</sub> | Contribution of longer bonds (%) |
|-------------------------|-------|------|----------------|----------------------------------|
| (AzrH)SnCl <sub>3</sub> | 270   | 2.13 | 2.36           | 11.3                             |
|                         | 180   | 2.07 | 2.36           | 11.8                             |
|                         | 120   | 2.07 | 2.36           | 12.1                             |
| (AzrH)SnBr <sub>3</sub> | 180   | 2.13 | 2.55           | 23.6                             |
|                         | 120   | 2.23 | 2.55           | 19.8                             |
| (AzrH)SnI <sub>3</sub>  | 180   | 2.14 | 2.76           | –                                |
|                         | 108   | 2.27 | 2.76           | 31.5                             |

Table S3. Goldschmidt tolerance factors of (AzrH)SnX<sub>3</sub> perovskites and their closest analogues ABX<sub>3</sub> where A = MA, FA, AzrH, B = Sn, Pb, X = Cl, Br, I.

| Compound             | Tolerance factor | Compound            | Tolerance factor | Compound            | Tolerance factor |
|----------------------|------------------|---------------------|------------------|---------------------|------------------|
| Sn series            |                  |                     |                  |                     |                  |
| AzrSnCl <sub>3</sub> | 0.978            | MASnCl <sub>3</sub> | 0.945            | FASnCl <sub>3</sub> | 1.032            |
| AzrSnBr <sub>3</sub> | 0.969            | MASnBr <sub>3</sub> | 0.937            | FASnBr <sub>3</sub> | 1.021            |
| AzrSnI <sub>3</sub>  | 0.950            | MASnI <sub>3</sub>  | 0.920            | FASnI <sub>3</sub>  | 0.998            |
| Pb series            |                  |                     |                  |                     |                  |
| AzrPbCl <sub>3</sub> | 0.965            | MAPbCl <sub>3</sub> | 0.933            | FAPbCl <sub>3</sub> | 1.019            |
| AzrPbBr <sub>3</sub> | 0.956            | MAPbBr <sub>3</sub> | 0.925            | FAPbBr <sub>3</sub> | 1.008            |
| AzrPbI <sub>3</sub>  | 0.939            | MAPbI <sub>3</sub>  | 0.909            | FAPbI <sub>3</sub>  | 0.987            |

Ionic radii (Å) used for calculations<sup>5</sup>:

| Cation           | Radius | Cation           | Radius | Anion           | Radius |
|------------------|--------|------------------|--------|-----------------|--------|
| AZR <sup>+</sup> | 2.30   | Sn <sup>2+</sup> | 1.15   | Cl <sup>-</sup> | 1.85   |
| MA <sup>+</sup>  | 2.16   | Pb <sup>2+</sup> | 1.19   | Br <sup>-</sup> | 1.96   |
| FA <sup>+</sup>  | 2.53   |                  |        | I <sup>-</sup>  | 2.20   |

Goldschmidt tolerance factors for ABX<sub>3</sub> were calculated as

$$t = \frac{r_A + r_X}{\sqrt{2}(r_B + r_X)}$$

## Crystallographic tables for SnI (180 K)

**Table S1.1 Crystal data and structure refinement for SnI (180 K).**

|                                                |                                                                |
|------------------------------------------------|----------------------------------------------------------------|
| Empirical formula                              | C <sub>2</sub> I <sub>3</sub> NSn                              |
| Formula weight                                 | 537.42                                                         |
| Temperature/K                                  | 180                                                            |
| Crystal system                                 | cubic                                                          |
| Space group                                    | <i>Pm</i> $\bar{3}$ <i>m</i>                                   |
| <i>a</i> /Å                                    | 6.2847(3)                                                      |
| Volume/Å <sup>3</sup>                          | 248.23(4)                                                      |
| Z                                              | 1                                                              |
| $\rho_{\text{calc}}/\text{cm}^3$               | 3.595                                                          |
| $\mu/\text{mm}^{-1}$                           | 11.821                                                         |
| Crystal size/mm <sup>3</sup>                   | 0.17 × 0.05 × 0.04                                             |
| 2 $\Theta$ range for data collection/°         | 6.484 to 58.21                                                 |
| Reflections collected                          | 269                                                            |
| Independent reflections                        | 88 [ $R_{\text{int}} = 0.0379$ , $R_{\text{sigma}} = 0.0361$ ] |
| Data/restraints/parameters                     | 88/0/8                                                         |
| Goodness-of-fit on F <sup>2</sup>              | 0.808                                                          |
| Final <i>R</i> indexes [ $I \geq 2\sigma(I)$ ] | $R_1 = 0.0307$ , $wR_2 = 0.0837$                               |
| Final <i>R</i> indexes [all data]              | $R_1 = 0.0500$ , $wR_2 = 0.1166$                               |
| Largest diff. peak/hole / e Å <sup>-3</sup>    | 0.78/-0.80                                                     |

**Table S1.2 Bond Lengths for SnI (180 K).**

|                     | Bond length/Å |
|---------------------|---------------|
| Sn1–I1 <sup>1</sup> | 3.14233(17)   |
| C1–C1 <sup>2</sup>  | 1.46(5)       |

<sup>1</sup>+ *x*, 1 – *z*, 1 + *y*; <sup>2</sup>1 + *y*, 1 – *x*, –*z*;

**Table S1.3 Bond Angles for SnI (180 K).**

|                                     | Angle/° |
|-------------------------------------|---------|
| I1 <sup>1</sup> –Sn1–I1             | 90      |
| I1–Sn1–I1 <sup>2</sup>              | 180     |
| C1 <sup>3</sup> –C1–C1 <sup>4</sup> | 60      |

<sup>1</sup>+ *x*, 1 – *z*, 1 + *y*; <sup>2</sup>+ *x*, 1 + *y*, + *z*; <sup>3</sup>+ *x*, + *z*, – *y*; <sup>4</sup>2 – *x*, – *y*, – *z*.

## Crystallographic tables for SnI (105 K)

**Table S2.1 Crystal data and structure refinement for SnI (105 K).**

|                                                       |                                                                         |
|-------------------------------------------------------|-------------------------------------------------------------------------|
| Empirical formula                                     | C <sub>2</sub> H <sub>6</sub> I <sub>3</sub> NSn                        |
| Formula weight                                        | 543.47                                                                  |
| Temperature/K                                         | 105                                                                     |
| Crystal system                                        | orthorhombic                                                            |
| Space group                                           | <i>Pbca</i>                                                             |
| a/Å                                                   | 9.0636(8)                                                               |
| b/Å                                                   | 12.5283(13)                                                             |
| c/Å                                                   | 17.1804(16)                                                             |
| Volume/Å <sup>3</sup>                                 | 1950.9(3)                                                               |
| Z                                                     | 8                                                                       |
| ρ <sub>calc</sub> /cm <sup>3</sup>                    | 3.701                                                                   |
| μ/mm <sup>-1</sup>                                    | 12.034                                                                  |
| Crystal size/mm <sup>3</sup>                          | 0.16 × 0.05 × 0.03                                                      |
| 2θ range for data collection/°                        | 4.742 to 51.35                                                          |
| Reflections collected                                 | 4656                                                                    |
| Independent reflections                               | 4656 [ <i>R</i> <sub>int</sub> = ?, <i>R</i> <sub>sigma</sub> = 0.1990] |
| Data/restraints/parameters                            | 4656/0/65                                                               |
| Goodness-of-fit on F <sup>2</sup>                     | 0.749                                                                   |
| Final <i>R</i> indexes [ <i>I</i> >= 2σ ( <i>I</i> )] | <i>R</i> <sub>1</sub> = 0.0555, w <i>R</i> <sub>2</sub> = 0.0978        |
| Final <i>R</i> indexes [all data]                     | <i>R</i> <sub>1</sub> = 0.1370, w <i>R</i> <sub>2</sub> = 0.1108        |
| Largest diff. peak/hole / e Å <sup>-3</sup>           | 2.33/-1.41                                                              |

**Table S2.2 Bond Lengths for SnI (105 K).**

|                     | <b>Bond<br/>length/Å</b> |
|---------------------|--------------------------|
| Sn1–I1              | 2.990(2)                 |
| Sn1–I1 <sup>1</sup> | 3.3209(18)               |
| Sn1–I2 <sup>2</sup> | 3.256(3)                 |
| Sn1–I2              | 3.036(3)                 |
| Sn1–I3              | 2.9850(19)               |
| Sn1–I3 <sup>3</sup> | 3.2960(19)               |
| C1–N1               | 1.46(3)                  |
| C1–C2               | 1.48(3)                  |
| N1–C2               | 1.49(3)                  |

<sup>1</sup>1/2 + *x*, + *y*, 1/2 – *z*; <sup>2</sup>1/2 – *x*, – 1/2 + *y*, + *z*; <sup>3</sup>1/2 + *x*, 1/2 – *y*, – *z*.

**Table S2.3 Bond Angles for SnI (105 K).**

|                                      | <b>Angle/°</b> |
|--------------------------------------|----------------|
| I1–Sn1–I1 <sup>1</sup>               | 92.35(4)       |
| I1–Sn1–I <sup>2</sup>                | 93.34(7)       |
| I1–Sn1–I2 <sup>2</sup>               | 89.84(7)       |
| I1–Sn1–I3 <sup>3</sup>               | 170.46(7)      |
| I2–Sn1–I1 <sup>1</sup>               | 86.26(6)       |
| I2 <sup>2</sup> –Sn1–I1 <sup>1</sup> | 96.61(6)       |
| I2–Sn1–I2 <sup>2</sup>               | 175.63(8)      |
| I2–Sn1–I3 <sup>3</sup>               | 91.28(6)       |
| I2 <sup>2</sup> –Sn1–I3 <sup>3</sup> | 86.02(5)       |
| I3–Sn1–I1 <sup>1</sup>               | 171.61(7)      |
| I3 <sup>3</sup> –Sn1–I1 <sup>1</sup> | 79.62(5)       |
| I3–Sn1–I1                            | 95.23(6)       |
| I3–Sn1–I2                            | 89.72(6)       |
| I3–Sn1–I2 <sup>2</sup>               | 87.01(6)       |
| I3–Sn1–I3 <sup>3</sup>               | 93.14(4)       |
| N1–C1–C2                             | 61.1(15)       |
| C1–N1–C2                             | 60.2(15)       |
| C1–C2–N1                             | 58.7(15)       |

<sup>1</sup>1/2 + x, + y, 1/2 – z; <sup>2</sup>1/2 – x, – 1/2 + y, + z; <sup>3</sup>1/2 + x, 1/2 – y, –z.

## Crystallographic tables for SnBr (180 K)

**Table S3.1 Crystal data and structure refinement for SnBr (180 K).**

|                                                |                                                                |
|------------------------------------------------|----------------------------------------------------------------|
| Empirical formula                              | Br <sub>3</sub> C <sub>2</sub> NSn                             |
| Formula weight                                 | 396.45                                                         |
| Temperature/K                                  | 180(2)                                                         |
| Crystal system                                 | cubic                                                          |
| Space group                                    | <i>Pm</i> $\bar{3}$ <i>m</i>                                   |
| a/Å                                            | 5.9849(3)                                                      |
| Volume/Å <sup>3</sup>                          | 214.37(3)                                                      |
| Z                                              | 1                                                              |
| $\rho_{\text{calc}}/\text{cm}^3$               | 3.071                                                          |
| $\mu/\text{mm}^{-1}$                           | 16.864                                                         |
| Crystal size/mm <sup>3</sup>                   | 0.1 × 0.03 × 0.03                                              |
| 2 $\Theta$ range for data collection/°         | 6.808 to 58.158                                                |
| Reflections collected                          | 257                                                            |
| Independent reflections                        | 78 [ $R_{\text{int}} = 0.0388$ , $R_{\text{sigma}} = 0.0416$ ] |
| Data/restraints/parameters                     | 78/0/9                                                         |
| Goodness-of-fit on F <sup>2</sup>              | 0.825                                                          |
| Final <i>R</i> indexes [ $I \geq 2\sigma(I)$ ] | $R_1 = 0.0307$ , $wR_2 = 0.0682$                               |
| Final <i>R</i> indexes [all data]              | $R_1 = 0.0321$ , $wR_2 = 0.0711$                               |
| Largest diff. peak/hole / e Å <sup>-3</sup>    | 0.44/-0.48                                                     |

**Table S3.2 Bond Lengths for SnBr (180 K).**

|                      | <b>Bond<br/>length/Å</b> |
|----------------------|--------------------------|
| Sn1–Br1 <sup>1</sup> | 2.775(4)                 |
| C1–C1 <sup>2</sup>   | 1.39(5)                  |

<sup>1</sup>1 – y, 1 – z, 1 – x; <sup>2</sup>– z, – x, – y.

**Table S3.3 Bond Angles for SnBr (180 K).**

|                                        | <b>Angle/°</b> |
|----------------------------------------|----------------|
| Br1 <sup>1</sup> –Sn1–Br1 <sup>2</sup> | 180            |
| Br1 <sup>1</sup> –Sn1–Br1              | 90             |
| C1 <sup>2</sup> –C1–C1 <sup>3</sup>    | 60.002(1)      |

<sup>1</sup>1 – y, 1 – z, 1 – x; <sup>2</sup>+ y, + z, + x; <sup>3</sup>– x, – y, – z.

## Crystallographic tables for SnBr (120 K)

**Table S4.1 Crystal data and structure refinement for SnBr (120 K).**

|                                                      |                                                                         |
|------------------------------------------------------|-------------------------------------------------------------------------|
| Empirical formula                                    | C <sub>2</sub> H <sub>6</sub> Br <sub>3</sub> NSn                       |
| Formula weight                                       | 402.50                                                                  |
| Temperature/K                                        | 120.00(10)                                                              |
| Crystal system                                       | orthorhombic                                                            |
| Space group                                          | <i>Pbca</i>                                                             |
| a/Å                                                  | 8.6989(16)                                                              |
| b/Å                                                  | 11.969(3)                                                               |
| c/Å                                                  | 16.144(4)                                                               |
| Volume/Å <sup>3</sup>                                | 1680.8(7)                                                               |
| Z                                                    | 8                                                                       |
| ρ <sub>calc</sub> /cm <sup>3</sup>                   | 3.181                                                                   |
| μ/mm <sup>-1</sup>                                   | 17.210                                                                  |
| Crystal size/mm <sup>3</sup>                         | 0.09 × 0.076 × 0.053                                                    |
| 2θ range for data collection/°                       | 5.046 to 58.694                                                         |
| Reflections collected                                | 8045                                                                    |
| Independent reflections                              | 8045 [ <i>R</i> <sub>int</sub> = ?, <i>R</i> <sub>sigma</sub> = 0.2096] |
| Data/restraints/parameters                           | 8045/15/67                                                              |
| Goodness-of-fit on F <sup>2</sup>                    | 0.942                                                                   |
| Final <i>R</i> indexes [ <i>I</i> ≥ 2σ ( <i>I</i> )] | <i>R</i> <sub>1</sub> = 0.0786, w <i>R</i> <sub>2</sub> = 0.1890        |
| Final <i>R</i> indexes [all data]                    | <i>R</i> <sub>1</sub> = 0.1577, w <i>R</i> <sub>2</sub> = 0.2138        |
| Largest diff. peak/hole / e Å <sup>-3</sup>          | 4.01/-2.67                                                              |

**Table S4.2 Bond Lengths for SnBr (120 K).**

|         | Bond<br>length/Å |
|---------|------------------|
| Sn1–Br3 | 2.745(3)         |
| Sn1–Br2 | 2.733(3)         |
| Sn1–Br1 | 2.746(3)         |
| N1–C2   | 1.460(2)         |
| N1–C1   | 1.460(2)         |
| C2–C1   | 1.460(2)         |

**Table S4.3 Bond Angles for SnBr (120 K).**

|             | Angle/°   |
|-------------|-----------|
| Br3–Sn1–Br1 | 92.30(10) |
| Br2–Sn1–Br3 | 94.04(9)  |
| Br2–Sn1–Br1 | 89.71(10) |
| C1–N1–C2    | 60.00(12) |
| C1–C2–N1    | 60.00(12) |
| C2–C1–N1    | 60.00(12) |



## Crystallographic tables for SnCl (270 K)

**Table S5.1 Crystal data and structure refinement for SnCl (270 K).**

|                                                      |                                                                             |
|------------------------------------------------------|-----------------------------------------------------------------------------|
| Empirical formula                                    | C <sub>2</sub> Cl <sub>3</sub> NSn                                          |
| Formula weight                                       | 263.07                                                                      |
| Temperature/K                                        | 270.00(14)                                                                  |
| Crystal system                                       | orthorhombic                                                                |
| Space group                                          | <i>Pnma</i>                                                                 |
| a/Å                                                  | 11.6343(11)                                                                 |
| b/Å                                                  | 8.3830(6)                                                                   |
| c/Å                                                  | 8.0626(6)                                                                   |
| Volume/Å <sup>3</sup>                                | 786.34(11)                                                                  |
| Z                                                    | 4                                                                           |
| ρ <sub>calc</sub> /cm <sup>3</sup>                   | 2.222                                                                       |
| μ/mm <sup>-1</sup>                                   | 4.164                                                                       |
| Crystal size/mm <sup>3</sup>                         | 0.13 × 0.11 × 0.07                                                          |
| 2θ range for data collection/°                       | 6.148 to 58.262                                                             |
| Reflections collected                                | 3120                                                                        |
| Independent reflections                              | 981 [ <i>R</i> <sub>int</sub> = 0.0314, <i>R</i> <sub>sigma</sub> = 0.0403] |
| Data/restraints/parameters                           | 981/6/38                                                                    |
| Goodness-of-fit on F <sup>2</sup>                    | 1.072                                                                       |
| Final <i>R</i> indexes [ <i>I</i> ≥ 2σ ( <i>I</i> )] | <i>R</i> <sub>1</sub> = 0.0430, w <i>R</i> <sub>2</sub> = 0.0869            |
| Final <i>R</i> indexes [all data]                    | <i>R</i> <sub>1</sub> = 0.0735, w <i>R</i> <sub>2</sub> = 0.1028            |
| Largest diff. peak/hole / e Å <sup>-3</sup>          | 0.95/-0.94                                                                  |

**Table S5.2 Bond Lengths for SnCl (270 K).**

|                      | <b>Bond<br/>length/Å</b> |
|----------------------|--------------------------|
| Sn1–Cl2 <sup>1</sup> | 3.291(2)                 |
| Sn1–Cl2              | 2.530(2)                 |
| Sn1–Cl1              | 2.531(3)                 |
| C2A–N1A              | 1.464(19)                |
| C2A–C1A              | 1.406(19)                |
| N1A–C1A              | 1.456(19)                |
| C2B–N1B              | 1.50(2)                  |
| C2B–C1B              | 1.431(19)                |
| N1B–C1B              | 1.444(19)                |

<sup>1</sup> 3/2 – *x*, – 1/2 + *y*, – 1/2 + *z*.

**Table S5.3 Bond Angles for SnCl (270 K).**

|                                        | <b>Angle/°</b> |
|----------------------------------------|----------------|
| Cl2 <sup>1</sup> -Sn1-Cl <sup>2</sup>  | 90.38(9)       |
| Cl2 <sup>1</sup> -Sn1-Cl2 <sup>2</sup> | 88.003(13)     |
| Cl2-Sn1-Cl2 <sup>2</sup>               | 176.76(5)      |
| Cl2-Sn1-Cl1                            | 91.33(5)       |
| Cl1-Sn1-Cl2 <sup>2</sup>               | 85.90(5)       |
| Sn1-Cl2-Sn1 <sup>3</sup>               | 176.09(7)      |
| Sn1-Cl1-Sn1 <sup>4</sup>               | 175.96(9)      |
| C1A-C2A-N1A                            | 60.9(10)       |
| C1A-N1A-C2A                            | 57.6(10)       |
| C2A-C1A-N1A                            | 61.5(11)       |
| C1B-C2B-N1B                            | 59.1(10)       |
| C1B-N1B-C2B                            | 58.2(10)       |
| C2B-C1B-N1B                            | 62.7(11)       |

<sup>1</sup>+ x, 1/2 - y, + z; <sup>2</sup>3/2 - x, - 1/2 + y, - 1/2 + z; <sup>3</sup>3/2 - x, 1 - y, 1/2 + z;

<sup>4</sup>- 1/2 + x, 1/2 - y, 1/2 - z.

## Crystallographic tables for SnCl (180 K)

**Table S6.1 Crystal data and structure refinement for SnCl (180 K).**

|                                                      |                                                                         |
|------------------------------------------------------|-------------------------------------------------------------------------|
| Empirical formula                                    | C <sub>2</sub> H <sub>6</sub> Cl <sub>3</sub> NSn                       |
| Formula weight                                       | 269.12                                                                  |
| Temperature/K                                        | 179(2)                                                                  |
| Crystal system                                       | monoclinic                                                              |
| Space group                                          | <i>P</i> 2 <sub>1</sub> / <i>n</i>                                      |
| <i>a</i> /Å                                          | 8.1182(6)                                                               |
| <i>b</i> /Å                                          | 11.5499(6)                                                              |
| <i>c</i> /Å                                          | 8.1286(5)                                                               |
| β/°                                                  | 90.283(6)                                                               |
| Volume/Å <sup>3</sup>                                | 762.16(8)                                                               |
| <i>Z</i>                                             | 4                                                                       |
| ρ <sub>calc</sub> /cm <sup>3</sup>                   | 2.345                                                                   |
| μ/mm <sup>-1</sup>                                   | 4.298                                                                   |
| Crystal size/mm <sup>3</sup>                         | 0.07 × 0.05 × 0.05                                                      |
| 2θ range for data collection/°                       | 6.128 to 52.74                                                          |
| Reflections collected                                | 1516                                                                    |
| Independent reflections                              | 1516 [ <i>R</i> <sub>int</sub> = ?, <i>R</i> <sub>sigma</sub> = 0.0322] |
| Data/restraints/parameters                           | 1516/0/65                                                               |
| Goodness-of-fit on F <sup>2</sup>                    | 1.157                                                                   |
| Final <i>R</i> indexes [ <i>I</i> ≥ 2σ ( <i>I</i> )] | <i>R</i> <sub>1</sub> = 0.0367, <i>wR</i> <sub>2</sub> = 0.0688         |
| Final <i>R</i> indexes [all data]                    | <i>R</i> <sub>1</sub> = 0.0415, <i>wR</i> <sub>2</sub> = 0.0708         |
| Largest diff. peak/hole / e Å <sup>-3</sup>          | 1.11/-1.16                                                              |

**Table S6.2 Bond Lengths for SnCl (180 K).**

|         | Bond length/Å |
|---------|---------------|
| Sn1–Cl2 | 2.5283(15)    |
| Sn1–Cl1 | 2.559(2)      |
| Sn1–Cl3 | 2.546(2)      |
| N1–C1   | 1.433(10)     |
| N1–C2   | 1.449(12)     |
| C1–C2   | 1.460(13)     |

**Table S6.3 Bond Angles for SnCl (180 K).**

|             | Angle/°  |
|-------------|----------|
| Cl2–Sn1–Cl1 | 90.52(7) |
| Cl2–Sn1–Cl3 | 91.43(7) |
| Cl3–Sn1–Cl1 | 90.29(7) |
| C1–N1–C2    | 60.9(6)  |
| N1–C1–C2    | 60.1(6)  |
| N1–C2–C1    | 59.0(6)  |

## Crystallographic tables for SnCl (120 K)

**Table S7.1 Crystal data and structure refinement for SnCl (120 K).**

|                                                      |                                                                         |
|------------------------------------------------------|-------------------------------------------------------------------------|
| Empirical formula                                    | C <sub>2</sub> H <sub>6</sub> Cl <sub>3</sub> NSn                       |
| Formula weight                                       | 269.12                                                                  |
| Temperature/K                                        | 120.00(10)                                                              |
| Crystal system                                       | monoclinic                                                              |
| Space group                                          | <i>P</i> 2 <sub>1</sub> / <i>c</i>                                      |
| <i>a</i> /Å                                          | 8.0784(12)                                                              |
| <i>b</i> /Å                                          | 8.1003(10)                                                              |
| <i>c</i> /Å                                          | 11.5627(14)                                                             |
| β/°                                                  | 96.128(13)                                                              |
| Volume/Å <sup>3</sup>                                | 752.31(17)                                                              |
| <i>Z</i>                                             | 4                                                                       |
| ρ <sub>calc</sub> /cm <sup>3</sup>                   | 2.376                                                                   |
| μ/mm <sup>-1</sup>                                   | 4.355                                                                   |
| Crystal size/mm <sup>3</sup>                         | 0.13 × 0.11 × 0.09                                                      |
| 2θ range for data collection/°                       | 5.072 to 57.38                                                          |
| Reflections collected                                | 2534                                                                    |
| Independent reflections                              | 2534 [ <i>R</i> <sub>int</sub> = ?, <i>R</i> <sub>sigma</sub> = 0.0732] |
| Data/restraints/parameters                           | 2534/0/65                                                               |
| Goodness-of-fit on F <sup>2</sup>                    | 0.943                                                                   |
| Final <i>R</i> indexes [ <i>I</i> ≥ 2σ ( <i>I</i> )] | <i>R</i> <sub>1</sub> = 0.0442, w <i>R</i> <sub>2</sub> = 0.0887        |
| Final <i>R</i> indexes [all data]                    | <i>R</i> <sub>1</sub> = 0.0600, w <i>R</i> <sub>2</sub> = 0.0921        |
| Largest diff. peak/hole / e Å <sup>-3</sup>          | 3.59/-0.90                                                              |

**Table S7.2 Bond Lengths for SnCl (120 K).**

|         | <b>Bond<br/>length/Å</b> |
|---------|--------------------------|
| Sn1–Cl2 | 2.557(2)                 |
| Sn1–Cl3 | 2.544(2)                 |
| Sn1–Cl1 | 2.5338(17)               |
| N1–C2   | 1.452(10)                |
| N1–C1   | 1.468(10)                |
| C2–C1   | 1.453(11)                |

**Table S7.3 Bond Angles for SnCl (120 K).**

|             | <b>Angle/°</b> |
|-------------|----------------|
| Cl3–Sn1–Cl2 | 90.70(6)       |
| Cl1–Sn1–Cl2 | 92.19(7)       |
| Cl1–Sn1–Cl3 | 88.74(7)       |
| C2–N1–C1    | 59.7(5)        |
| N1–C2–C1    | 60.7(5)        |
| C2–C1–N1    | 59.6(5)        |

## References

- 1 D. Cook, *Can. J. Chem.*, 1964, **42**, 2292–2299.
- 2 W. J. Potts, *Spectrochim. Acta*, 1965, **21**, 511–527.
- 3 I. D. Brown, in *Structure and Bonding in Crystals. Volume 2*, eds. M. O’Keeffe and A. Navrotsky, Academic Press, 1981, pp. 1–30.
- 4 N. E. Brese and M. O’Keeffe, *Acta Crystallogr. Sect. B Struct. Sci.*, 1991, **47**, 192–197.
- 5 W. Travis, E. N. K. Glover, H. Bronstein, D. O. Scanlon and R. G. Palgrave, *Chem. Sci.*, 2016, **7**, 4548–4556.
